# Supplementary material for: Attenuation of Plasmodium falciparum in vitro drug resistance phenotype following culture adaptation compared to fresh clinical isolates in Cambodia
Source: PubMed Central journal article supplement (PMC4667454; doi:10.1186/s12936-015-1021-8), 2015-12-02
Supplement: 12936_2015_1021_MOESM2_ESM.pdf [file 12936_2015_1021_MOESM2_ESM.pdf]

## Additional file 2

**IC<sub>50</sub> obtained from 12 *P. falciparum* fresh isolates were higher than when culture-adapted from cryopreserved samples for both the HRP-2 and SYBR Green I assays.**

Geometric mean (range) IC<sub>50</sub> attained from fresh and culture-adapted samples of 12 *P. falciparum* isolates are shown. HRP-2 IC<sub>50</sub> were available for all 12 paired fresh/cultured samples, while only 10 isolates provided sufficient sample for SYBR Green I assay analysis. Differences in IC<sub>50</sub> between fresh and culture-adapted samples were compared using the Wilcoxon pair test for median differences and *P*-values are indicated. Correlations were examined with Spearman's nonparametric correlation test ( $\rho$ ) with corresponding *P*-values indicated. Significant differences and correlations are in **bold** lettering.

| Assay               | GM IC <sub>50</sub> (range) in nM, N (number of isolates) |                          |                           |                            |                           |
|---------------------|-----------------------------------------------------------|--------------------------|---------------------------|----------------------------|---------------------------|
|                     | DHA                                                       | AS                       | MQ                        | QN                         | CQ                        |
| <b>HRP-2</b>        |                                                           |                          |                           |                            |                           |
| Fresh isolates      | 10.6 (5.4-23.9), 12                                       | 8.2 (3.0-20.6), 12       | 93.2 (27.8-188.2), 12     | 182.3 (72.7-373.5), 12     | 158 (74.1-509.2), 12      |
| Cultured isolates   | 7.3 (4.4-14.4), 12                                        | 7.1 (3.4-11.4), 12       | 35.5 (7.1-97.5), 12       | 92.4 (45.6-153.6), 12      | 135.3 (57.7-264.8), 12    |
| Wilcoxon pair test  | $\Delta = -3.8, P=0.034$                                  | $\Delta = -0.1, P=0.519$ | $\Delta = -70.0, P=0.005$ | $\Delta = -77.0, P=0.001$  | $\Delta = -28.6, P=0.129$ |
| Spearman test       | $\rho = -0.1, P=0.716$                                    | $\rho = 0.4, P=0.169$    | $\rho = 0.5, P=0.128$     | $\rho = 0.7, P=0.019$      | $\rho = 0.7, P=0.010$     |
| <b>SYBR Green I</b> |                                                           |                          |                           |                            |                           |
| Fresh isolates      | 14.7 (8.8-26.6), 9                                        | 12.7 (4.9-38.9), 10      | 137.2 (56.2-195.5), 6     | 232.9 (49.5-462.1), 10     | 217.9 (137.6-455.3), 10   |
| Cultured isolates   | 7.4 (3.9-14.1), 9                                         | 7.6 (5.1-10.7), 10       | 115.5 (40.7-213.5), 6     | 144.2 (92.8-217.5), 10     | 170.5 (95.2-307.9), 10    |
| Wilcoxon pair test  | $\Delta = -7.8, P=0.004$                                  | $\Delta = -5.8, P=0.027$ | $\Delta = -5.5, P=0.688$  | $\Delta = -150.3, P=0.014$ | $\Delta = -47.5, P=0.037$ |
| Spearman test       | $\rho = 0.4, P=0.359$                                     | $\rho = 0.4, P=0.279$    | $\rho = 0.4, P=0.419$     | $\rho = 0.5, P=0.123$      | $\rho = 0.6, P=0.067$     |
