# Supplementary material for: Attenuation of Plasmodium falciparum in vitro drug resistance phenotype following culture adaptation compared to fresh clinical isolates in Cambodia
Source: PubMed Central journal article supplement (PMC4667454; doi:10.1186/s12936-015-1021-8), 2015-12-02
Supplement: 12936_2015_1021_MOESM4_ESM.pdf [file 12936_2015_1021_MOESM4_ESM.pdf]

#### Additional file 4

**Pfmdr1 copy number and alleles found in original and culture-adapted samples of 12 *P. falciparum* isolates from Cambodia.**

| <i>P. falciparum</i> isolates | Pfmdr1      |                           |      |       |        |        |
|-------------------------------|-------------|---------------------------|------|-------|--------|--------|
|                               | copy number | difference in copy number | N86Y | Y184F | S1034C | N1042D |
| OM-144_original               | 1.19        | 0.44                      | N    | YF    | S      | N      |
| OM144_culture                 | 1.63        |                           | N    | YF    | S      | N      |
| PL013_original                | 1.94        | -0.17                     | N    | F     | S      | N      |
| PL013_culture                 | 1.77        |                           | N    | F     | S      | N      |
| OM-184_original               | 3.08        | 0.07                      | N    | F     | S      | N      |
| OM184_culture                 | 3.15        |                           | N    | F     | S      | N      |
| OM-188_original               | 1.90        | 0.20                      | N    | F     | S      | N      |
| OM188_culture                 | 2.1         |                           | N    | F     | S      | N      |
| OM-351_original               | 0.99        | -0.29                     | N    | F     | S      | N      |
| OM-351_culture                | 0.70        |                           | N    | F     | S      | N      |
| OM-132_original               | 3.30        | -0.17                     | N    | F     | S      | N      |
| OM-132_culture                | 3.13        |                           | N    | F     | S      | N      |
| OM-250_original               | 0.80        | -0.07                     | N    | F     | S      | N      |
| OM-250_culture                | 0.73        |                           | N    | F     | S      | N      |
| KS-076_original               | 3.40        | 0.37                      | N    | F     | S      | N      |
| KS-076_culture                | 3.77        |                           | N    | F     | S      | N      |
| PL-004_original               | 1.00        | 0.14                      | N    | F     | S      | N      |
| PL-004_culture                | 1.14        |                           | N    | F     | S      | N      |
| PL-025_original               | 0.91        | 0.03                      | N    | F     | S      | N      |
| PL-025_culture                | 0.94        |                           | N    | F     | S      | N      |
| OM-352_original               | 3.52        | 0.27                      | N    | F     | S      | N      |
| OM-352_culture                | 3.79        |                           | N    | F     | S      | N      |
| OM-024_original               | 1.72        | 0.39                      | N    | F     | S      | N      |
| OM-024_culture                | 2.11        |                           | N    | F     | S      | N      |
