# Supplementary material for: Attenuation of Plasmodium falciparum in vitro drug resistance phenotype following culture adaptation compared to fresh clinical isolates in Cambodia
Source: Springer Nature journal article supplement (doi:10.1186/s12936-015-1021-8), 2015-12-01

### Additional file 3

#### Msp1/msp2/glurp genotypes found in original and culture adapted samples of 12 *P. falciparum* isolates from Cambodia.

Size of bands (in base pairs) are indicated on the Y-axis. Blue, pink and gray bars represent PCR bands detected for *msp1*, *msp2*, and *glurp*, respectively. Patterns of bars indicate *msp1* and *msp2* sub-families (see legend). \* Denotes polyclonal infection in both original and culture adapted samples as evidenced by the presence of two *msp2* alleles.

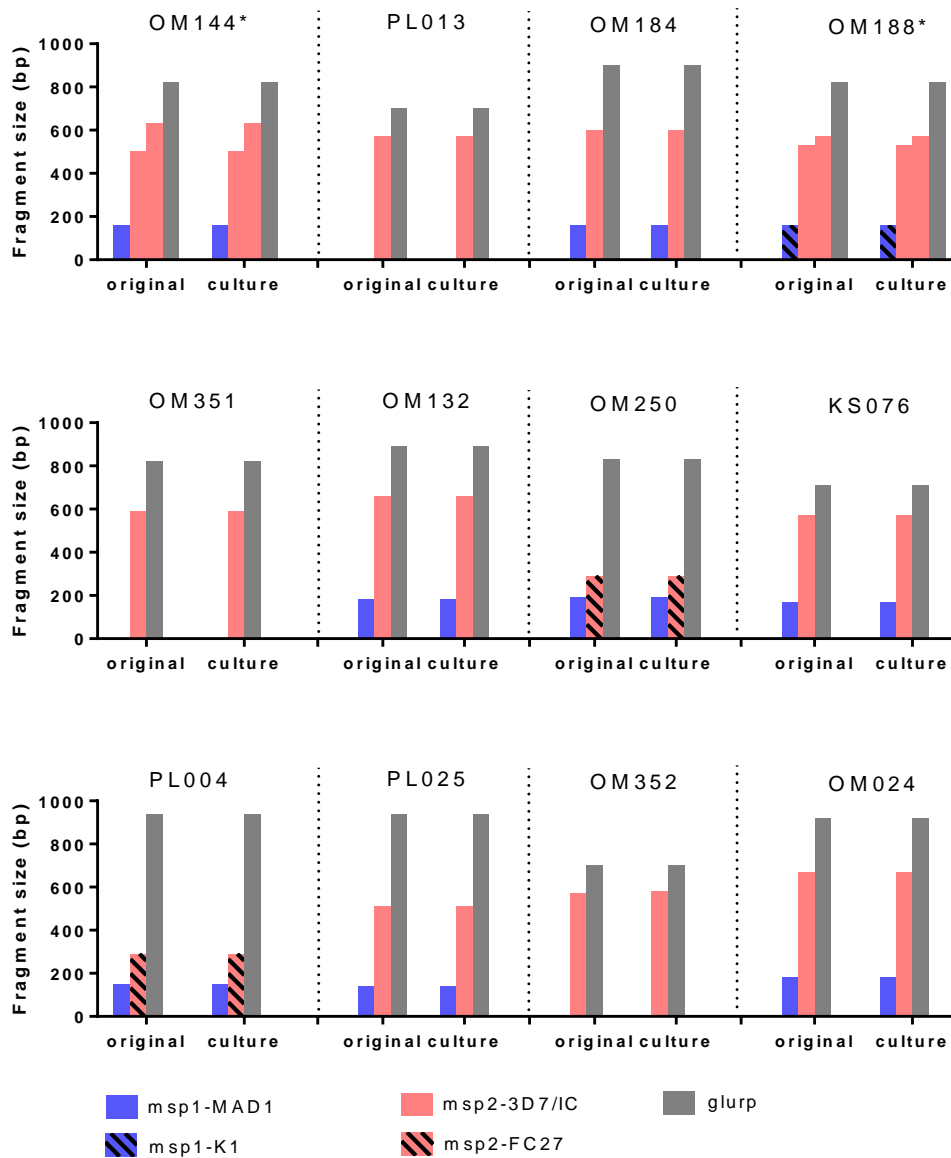

Supplement: MOESM3 [file 9761906]
